# Supplementary material for: Two Magnetic Orderings and a Spin–Flop Transition in Mixed Valence Compound Mn3O(SeO3)3
Source: MDPI journal article supplement (doi:10.3390/ma15165773), 2022-08-21
Supplement: s1 [file s1]

**Two Magnetic orderings and a spin-flop transition in mixed valence compound  
 $\text{Mn}_3\text{O}(\text{SeO}_3)_3$**

**Wanwan Zhang<sup>1</sup>, Meiyan Cui<sup>2</sup>, Jindou Tian<sup>3</sup>, Pengfeng Jiang<sup>1</sup>, Guoyu Qian<sup>1,\*</sup>,  
and Xia Lu<sup>1</sup>**

<sup>1</sup> School of Materials, Sun Yat-sen University, Guangzhou 510275, P. R. China.

<sup>2</sup> State Key Laboratory of Structural Chemistry, Fujian Institute of Research on the Structure of Matter, Chinese Academy of Sciences, Fuzhou, Fujian 350002, China.

<sup>3</sup> Department of Chemistry, University of Science and Technology of China, Hefei, Anhui 230026, China.

E-mail: qiangy@mail.sysu.edu.cn

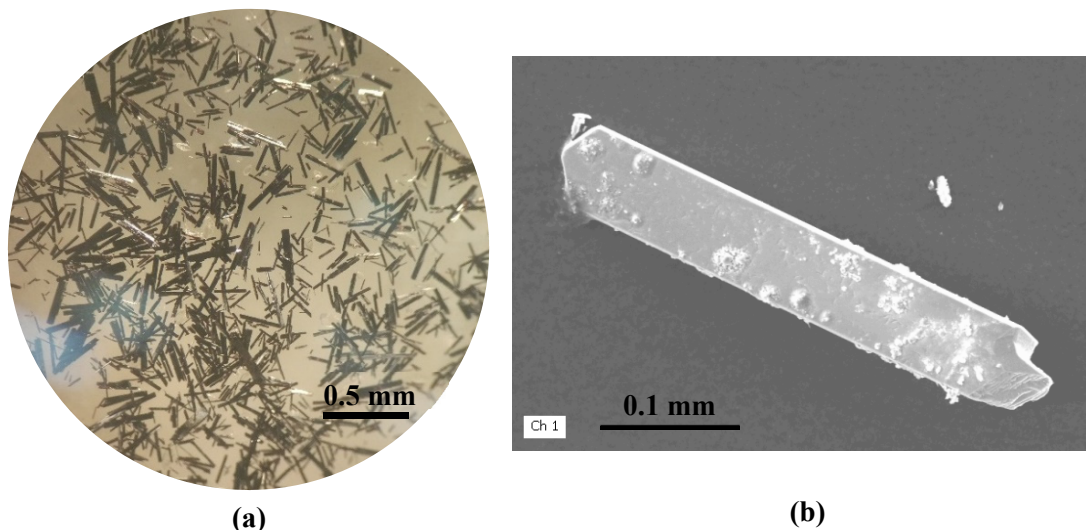

**Figure S1.** Single crystals of  $\text{Mn}_3\text{O}(\text{SeO}_3)_3$  obtained by a conventional hydrothermal method. (a) and (b) are the photos under optical microscope and scanning electron microscopy, respectively.

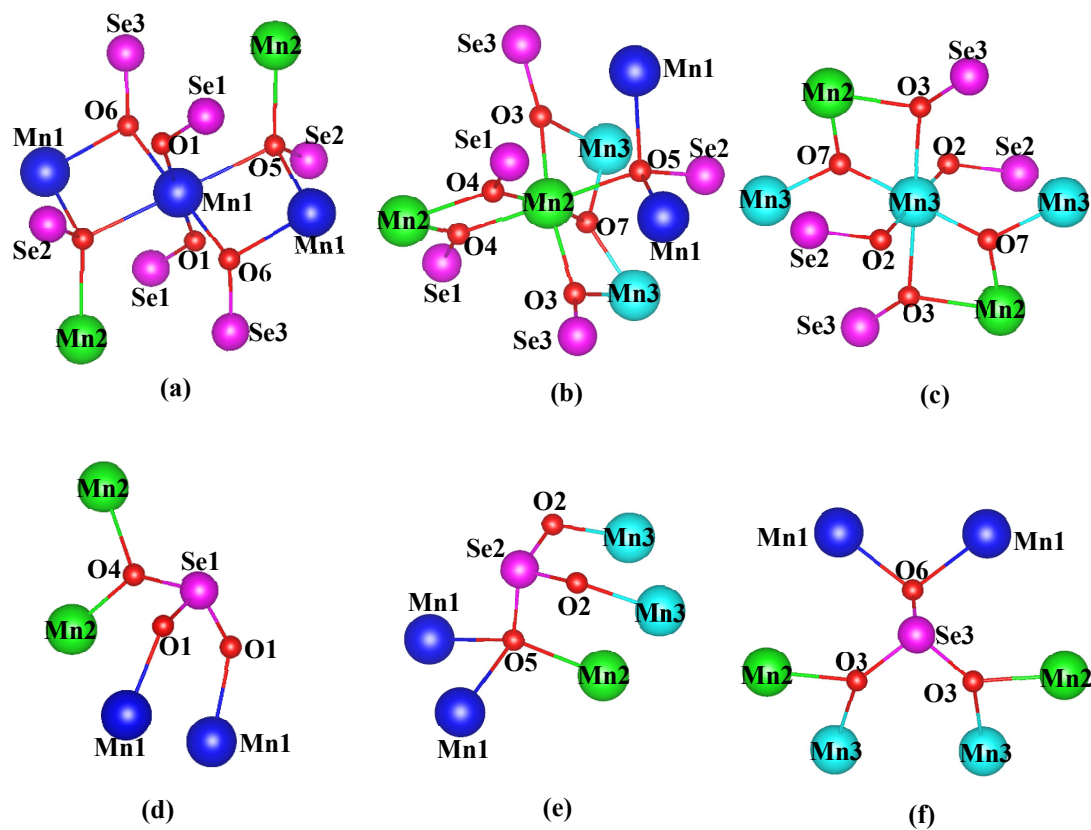

**Figure S2.** The oxygen-coordination environments for (a) Mn1, (b) Mn2, (c) Mn3, (d) Se1, (e) Se2 and (f) Se3 atoms in  $\text{Mn}_3\text{O}(\text{SeO}_3)_3$ .

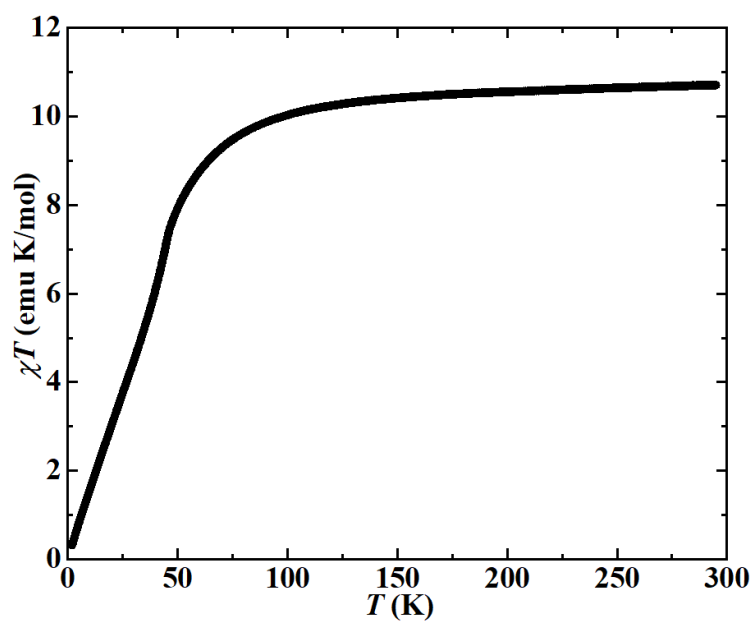

**Figure S3.** The variation of  $\chi T$  with the temperature of  $\text{Mn}_3\text{O}(\text{SeO}_3)_3$ . With the decreasing temperature, the value of  $\chi T$  decreases.

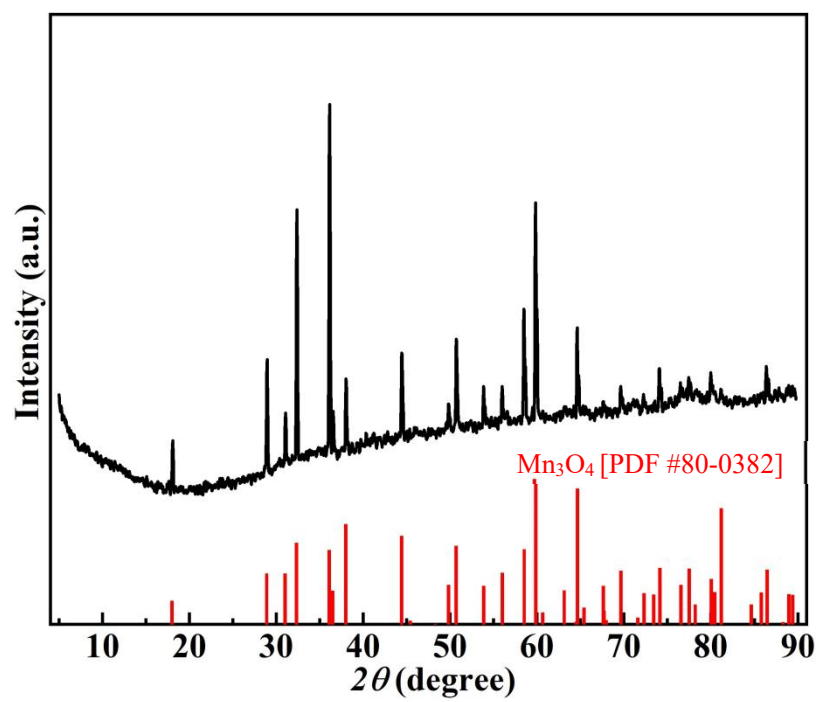

**Figure S4.** Powder X-ray diffraction pattern for the final residues of  $\text{Mn}_3\text{O}(\text{SeO}_3)_3$  after sintered at 800 °C for 10 minutes in nitrogen atmosphere.
